# Supplementary material for: Measurement of small molecule diffusion with an optofluidic silicon chip
Source: Royal Society of Chemistry journal article supplement (doi:10.1039/c3lc50752a), 2013-01-01
Supplement: c3lc50752a.pdf [file c3lc50752a.pdf]

## Electronic Supplementary Material (ESI)

---

Measurement of small molecule diffusion with an optofluidic silicon chip

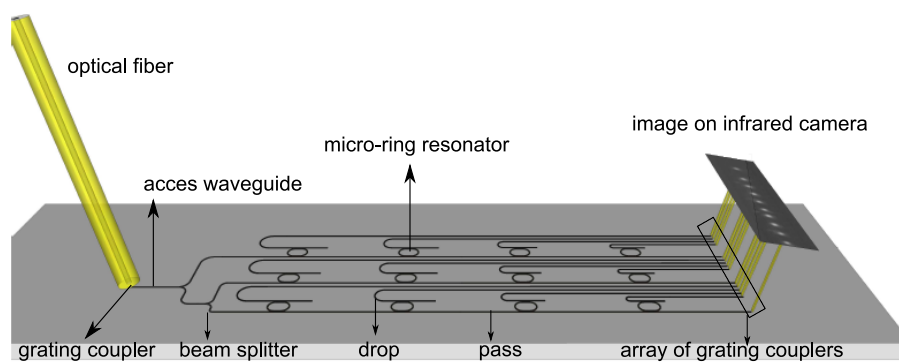

Figure 1: Optical read-out system and SOI design.

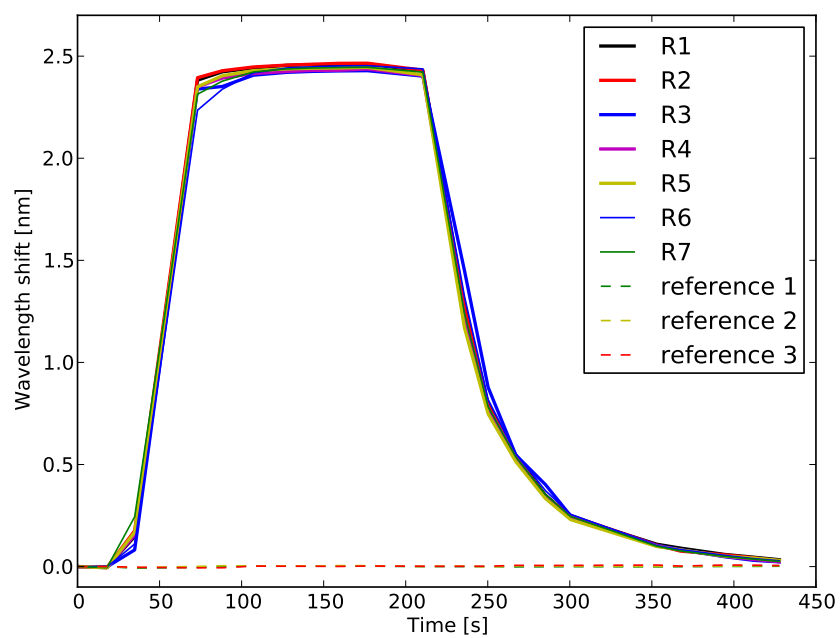

Figure 2: Shift in resonance wavelength due to the presence of glucose with a concentration of 300g/L for a set of seven ring resonators embedded in the microfluidic channel and 3 reference ring resonators outside the microfluidic channel.

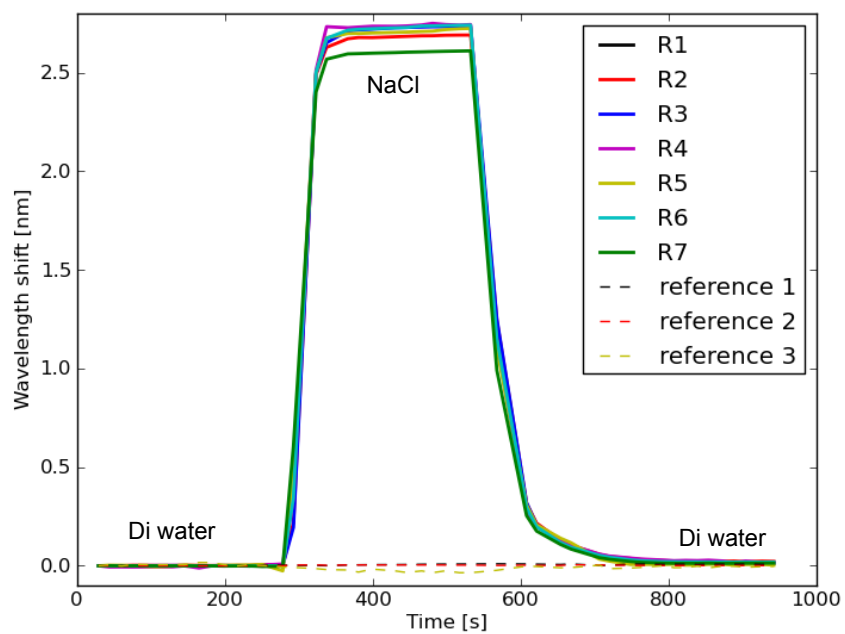

Figure 3: Shift in resonance wavelength due to the presence of NaCl with a concentration of 300 g/L for a set of seven ring resonators embedded in the microfluidic channel and 3 reference ring resonators outside the microfluidic channel.
